# Supplementary material for: Dioscin relieves diabetic nephropathy via suppressing oxidative stress and apoptosis, and improving mitochondrial quality and quantity control
Source: Royal Society of Chemistry journal article supplement (doi:10.1039/d1fo02733f), 2022-01-01

Full unedited gels for Fig. 4E

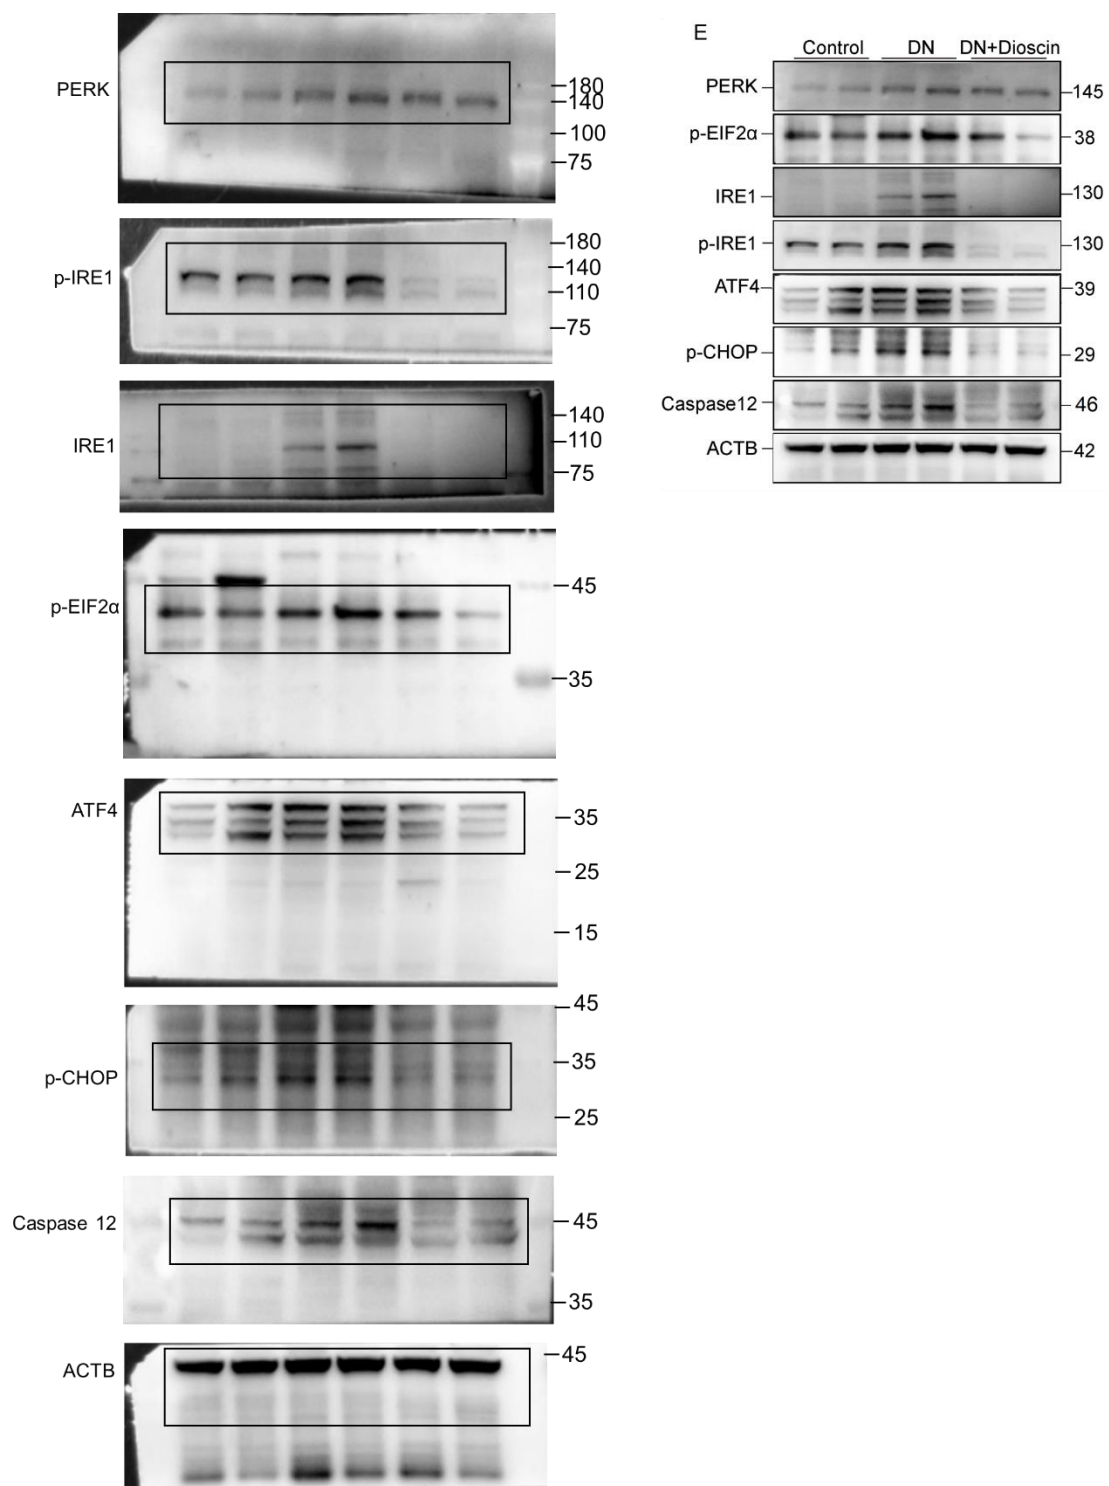

Full unedited gels for Fig. 5A

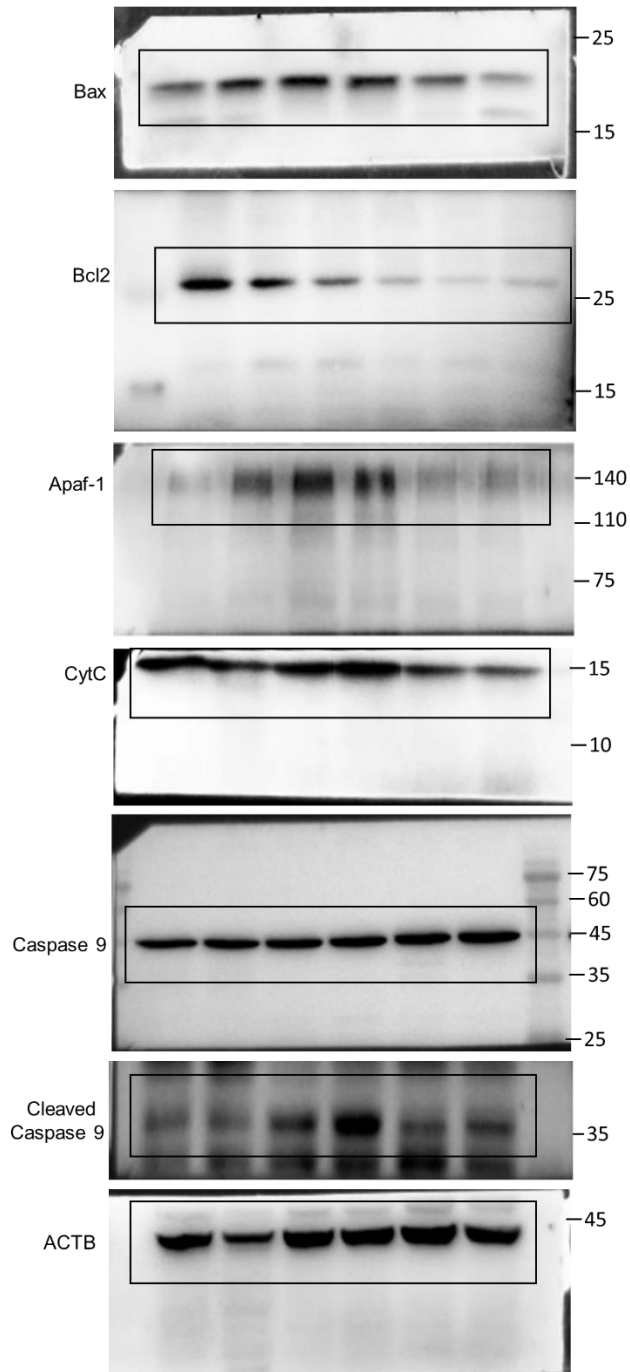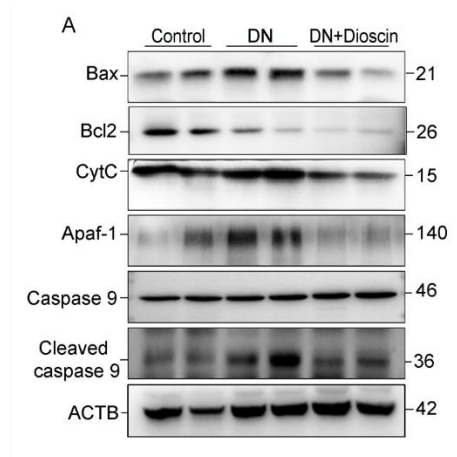

Full unedited gels for Fig. 6A

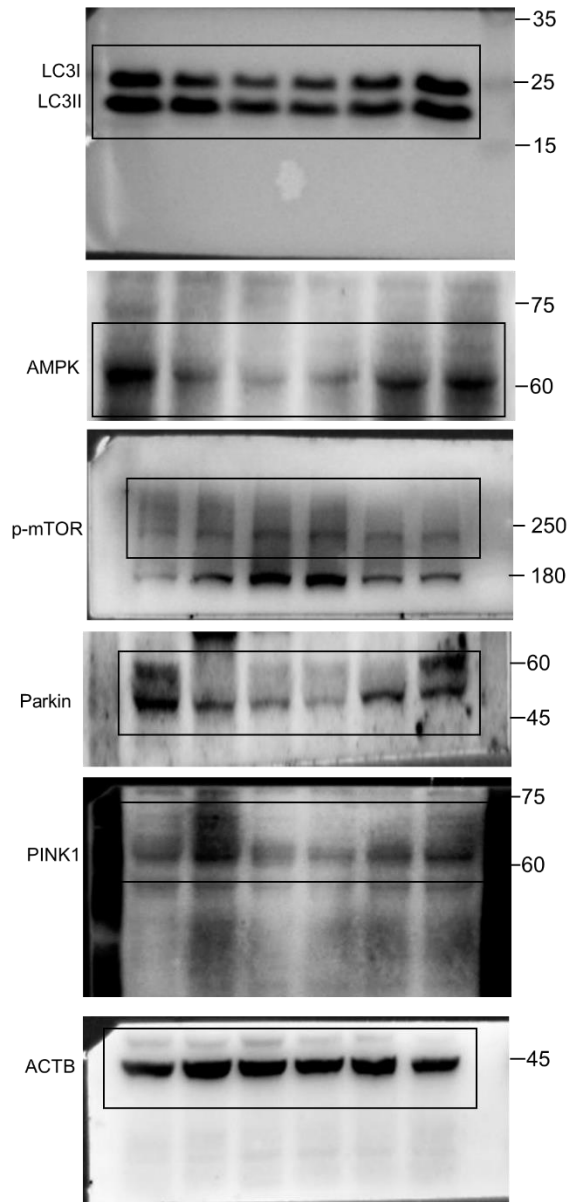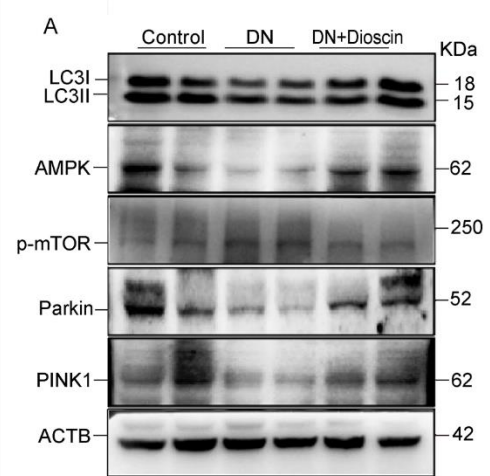

Full unedited gels for Fig. 7C

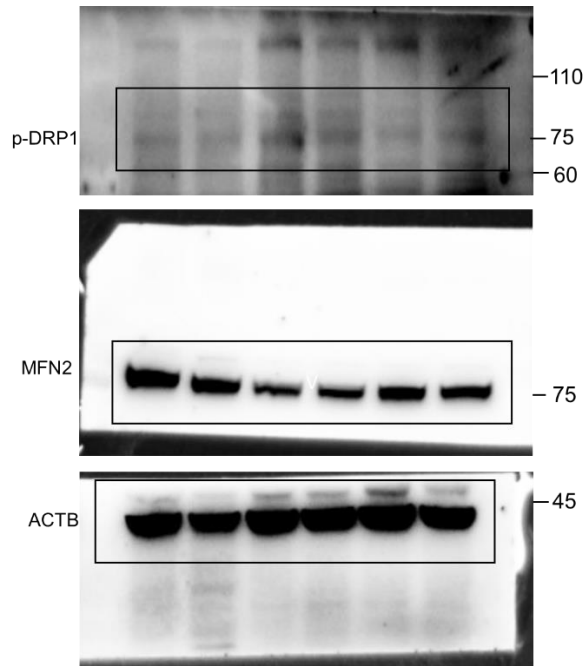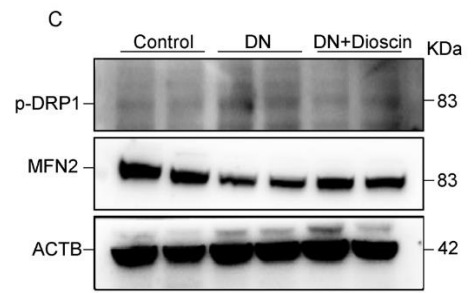

Supplement: d1fo02733f1.pdf [file d1fo02733f1.pdf]
